# Supplementary material
Source: Springer Nature journal article supplement (https://www.springermedizin.de/resource/supplementary/12885_2012_3975_MOESM1_ESM.pdf/9464822)
Supplement: MOESM1 [file 9464822]

**Online Table 1: The primer sequences of the oligonucleotides used for qPCR,**

| <b>EMT Markers</b>   | <b>Forward 5'-</b>       | <b>Reverse 5'</b>       |
|----------------------|--------------------------|-------------------------|
| m Snai1              | CTTGTGTCTGCACGACCTGT     | GGAGCAGGAGAATGGCTTC     |
| m Snai2              | ACAGCGAACTGGACACACAC     | CGAGGTGAGGATCTCTGGTT    |
| m ZEB1               | GCATGTGACCTGTGTGACAA     | CACACTCGTGAGGCCTCTTA    |
| m ZEB2               | CCTTCTGCGACATAAATACGAA   | CGAGTGCTCGATAAGGTGGT    |
| m TWIST1             | CGGACAAGCTGAGCAAGATT     | GCAGGACCTGGTACAGGAAG    |
| m TWIST2             | ACCAGTGAGGAAGAGCTGGA     | TCGCTCGATTTCTTGCTGTA    |
| m E-cadherin         | CCTGCCAATCCTGATGAAAT     | CGAACACCAACAGAGAGTCG    |
| vimentin             | TGTTGACACCCACTCAAAA      | GGTCATCGTGATGCTGAGAA    |
| <b>Notch pathway</b> |                          |                         |
| m Notch2             | GAATGGGGCCAACAGAGATA     | TTTGGCCGCTTCATAACTTC    |
| m Notch3             | AAAAATGGAGCCAACAAGGA     | CAGCTTGGCAGCCTCATAG     |
| m Notch4             | AGGCTGGAGCGGATAAAGAT     | AGGAAAAGCGGCGTCTGT      |
| m HES1               | TCTGGAAATGACTGTGAAGCA    | CGGTATTTCCCAACACG       |
| m Jagged2            | TTGTTATGGGTGGCTCTTCC     | AGCCACAGCACACTGAACAC    |
| m Jagged1            | GAGGCGTCCTCTGAAAAACA     | GAGCTCAGCAGAGGAACCAG    |
| VEGF A               | CCTGCAAAAACACAGACTCG     | CGCCTTGGCTTGTCACAT      |
| Hif-2 alpha          | CTCCAGGAGCTCAAAAGGTG     | CAGTTCCGGCAACAGGTAAG    |
| Hif-1 alpha          | ATTCTCCAAGCCCTCCAAGT     | GGTCTGCTGGAACCCAGTAA    |
| <b>WNT pathway</b>   |                          |                         |
| Lrp5                 | GCCACAGACCCCTCTCTCTA     | GCCATACCTCGAATGACGTAG   |
| Lrp6                 | TCCAACAGTCCTTCCACACA     | AAAGTGCCGGTAGCTGTACG    |
| SOST(Sclerostin)     | CCTCCTCCTGAGAACAACCA     | GCAGCTGTACTCGGACACAT    |
| DKK1                 | GGGGATGGATATCCCAGAAG     | GTCTGATGATCGGAGGCAGA    |
| DKK2                 | TAGGAAGGCCCACTCCAAG      | GTAGGCATGGGTCTCCTTCA    |
| DKK3                 | ACTGGAGCCTGAAGGAGCTT     | GGCTTGCACATGTACACCAG    |
| sfrp-1               | TCAGAGGCCATCATTGAACA     | TGGGGACAATCTTCTTGTC     |
| sfrp-2               | CGACATCATGGAAACCCTTT     | CAGGATGATCTTGGGTGTCTCTG |
| sfrp-4               | TGAAAAGTGGAGAGATCAACTCAG | CTGCTGTTCTGAAAGCCTCT    |
| mWnt3a               | CCATGAACCGTCACAACAAT     | CTTGAGGTGCATGTGACTGG    |
| mWnt5a               | AACAATGAAGCAGGCCGTAG     | GAGCCAGACACTCCATGACA    |
| Wnt4                 | CCGGGCACTCATGAATCTT      | CGCATGTGTGTCAAGATGG     |
| Wnt7b                | CGCCTCATGAACCTTCACA      | CCTGACACACCGTGACTT      |
| Wnt10b               | AGAATGCGGATCCACAACA      | CACTTCCGCTTCAGGTTTTTC   |
| Wif1                 | AACCCAACAAGTGCCAGTGT     | ATGAGGCTGGCTCCATAACC    |
| mCyclinD1            | CACAACGCACTTTCTTTCCA     | TCCAGAAGGGCTTCAATCTG    |
